# Supplementary material
Source: HighWire-hosted journal article supplement (https://www.cancerbiomed.org/content/20/3/218)
Supplement: media-1 [file media-1.pdf]

# Supplementary material

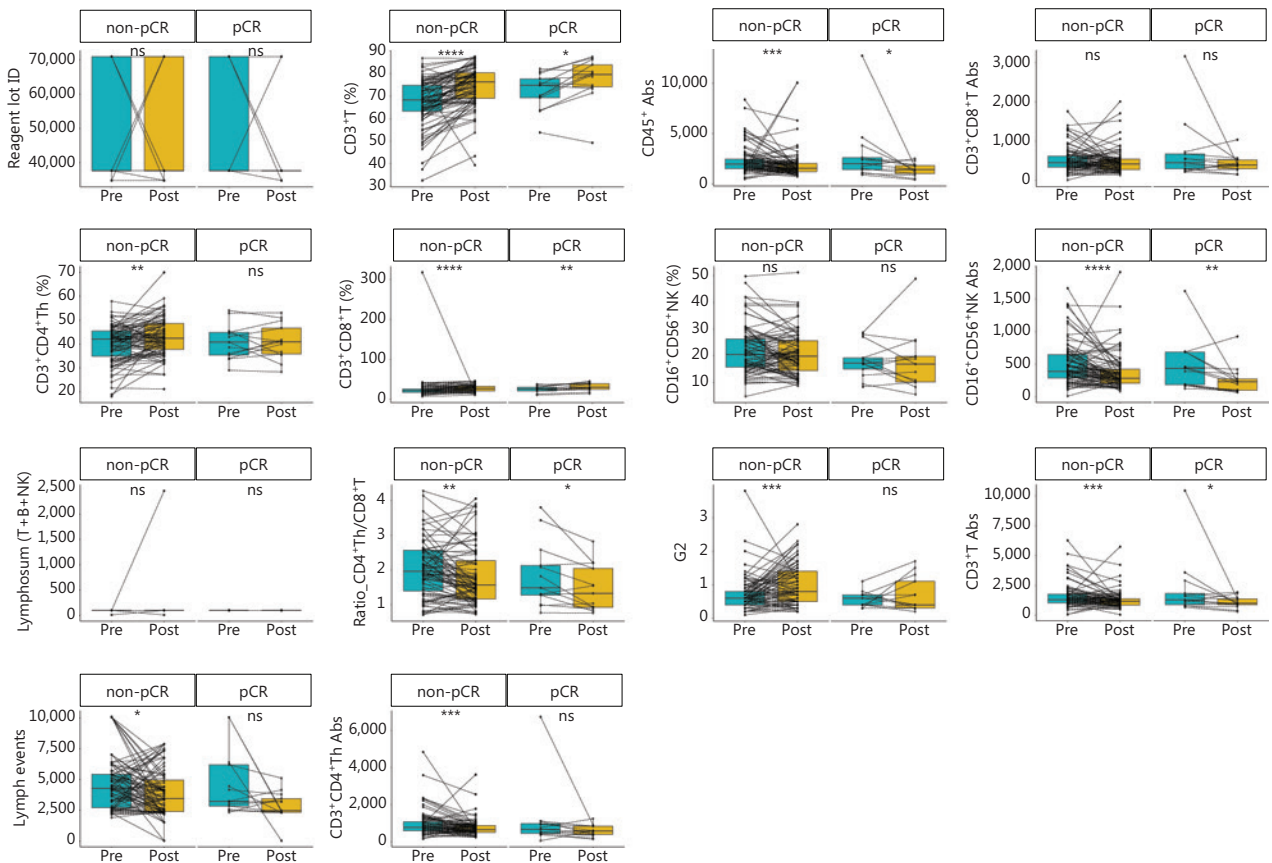

**Figure S1** Boxplots of dynamic changes for each immune functional index between the pCR and non-pCR groups. Asterisks (\*) represent the level of significance, \**P* < 0.05; \*\**P* < 0.01; \*\*\**P* < 0.001; \*\*\*\**P* < 0.0001; pre, the immune indices before neoadjuvant therapy; post, the immune indices after neoadjuvant therapy.
